# Supplementary material
Source: Research Square preprint supplement (doi:10.21203/rs.3.rs-9453151/v1)
Supplement: Supplementary file 1 [file 778d28f0392278f1522789c0.docx]

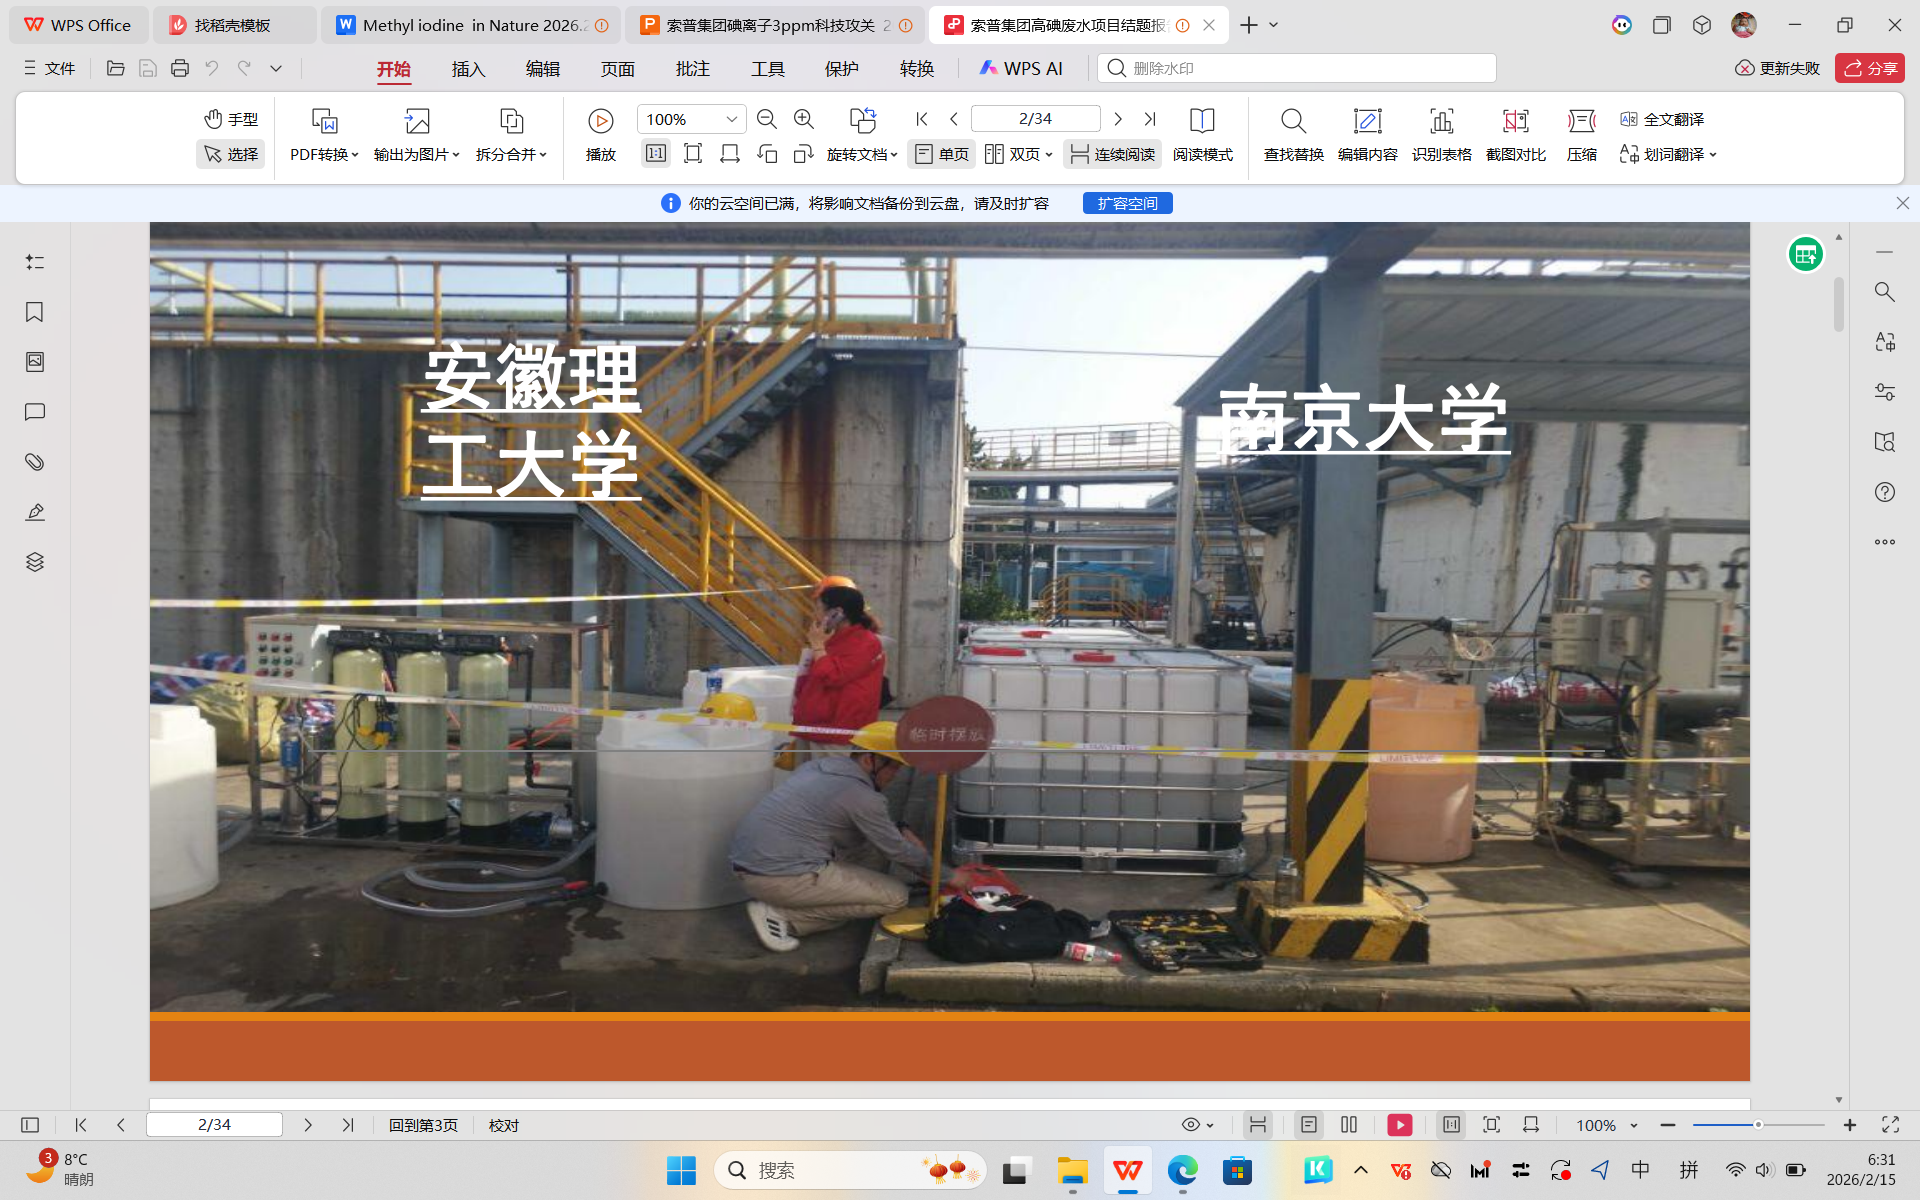


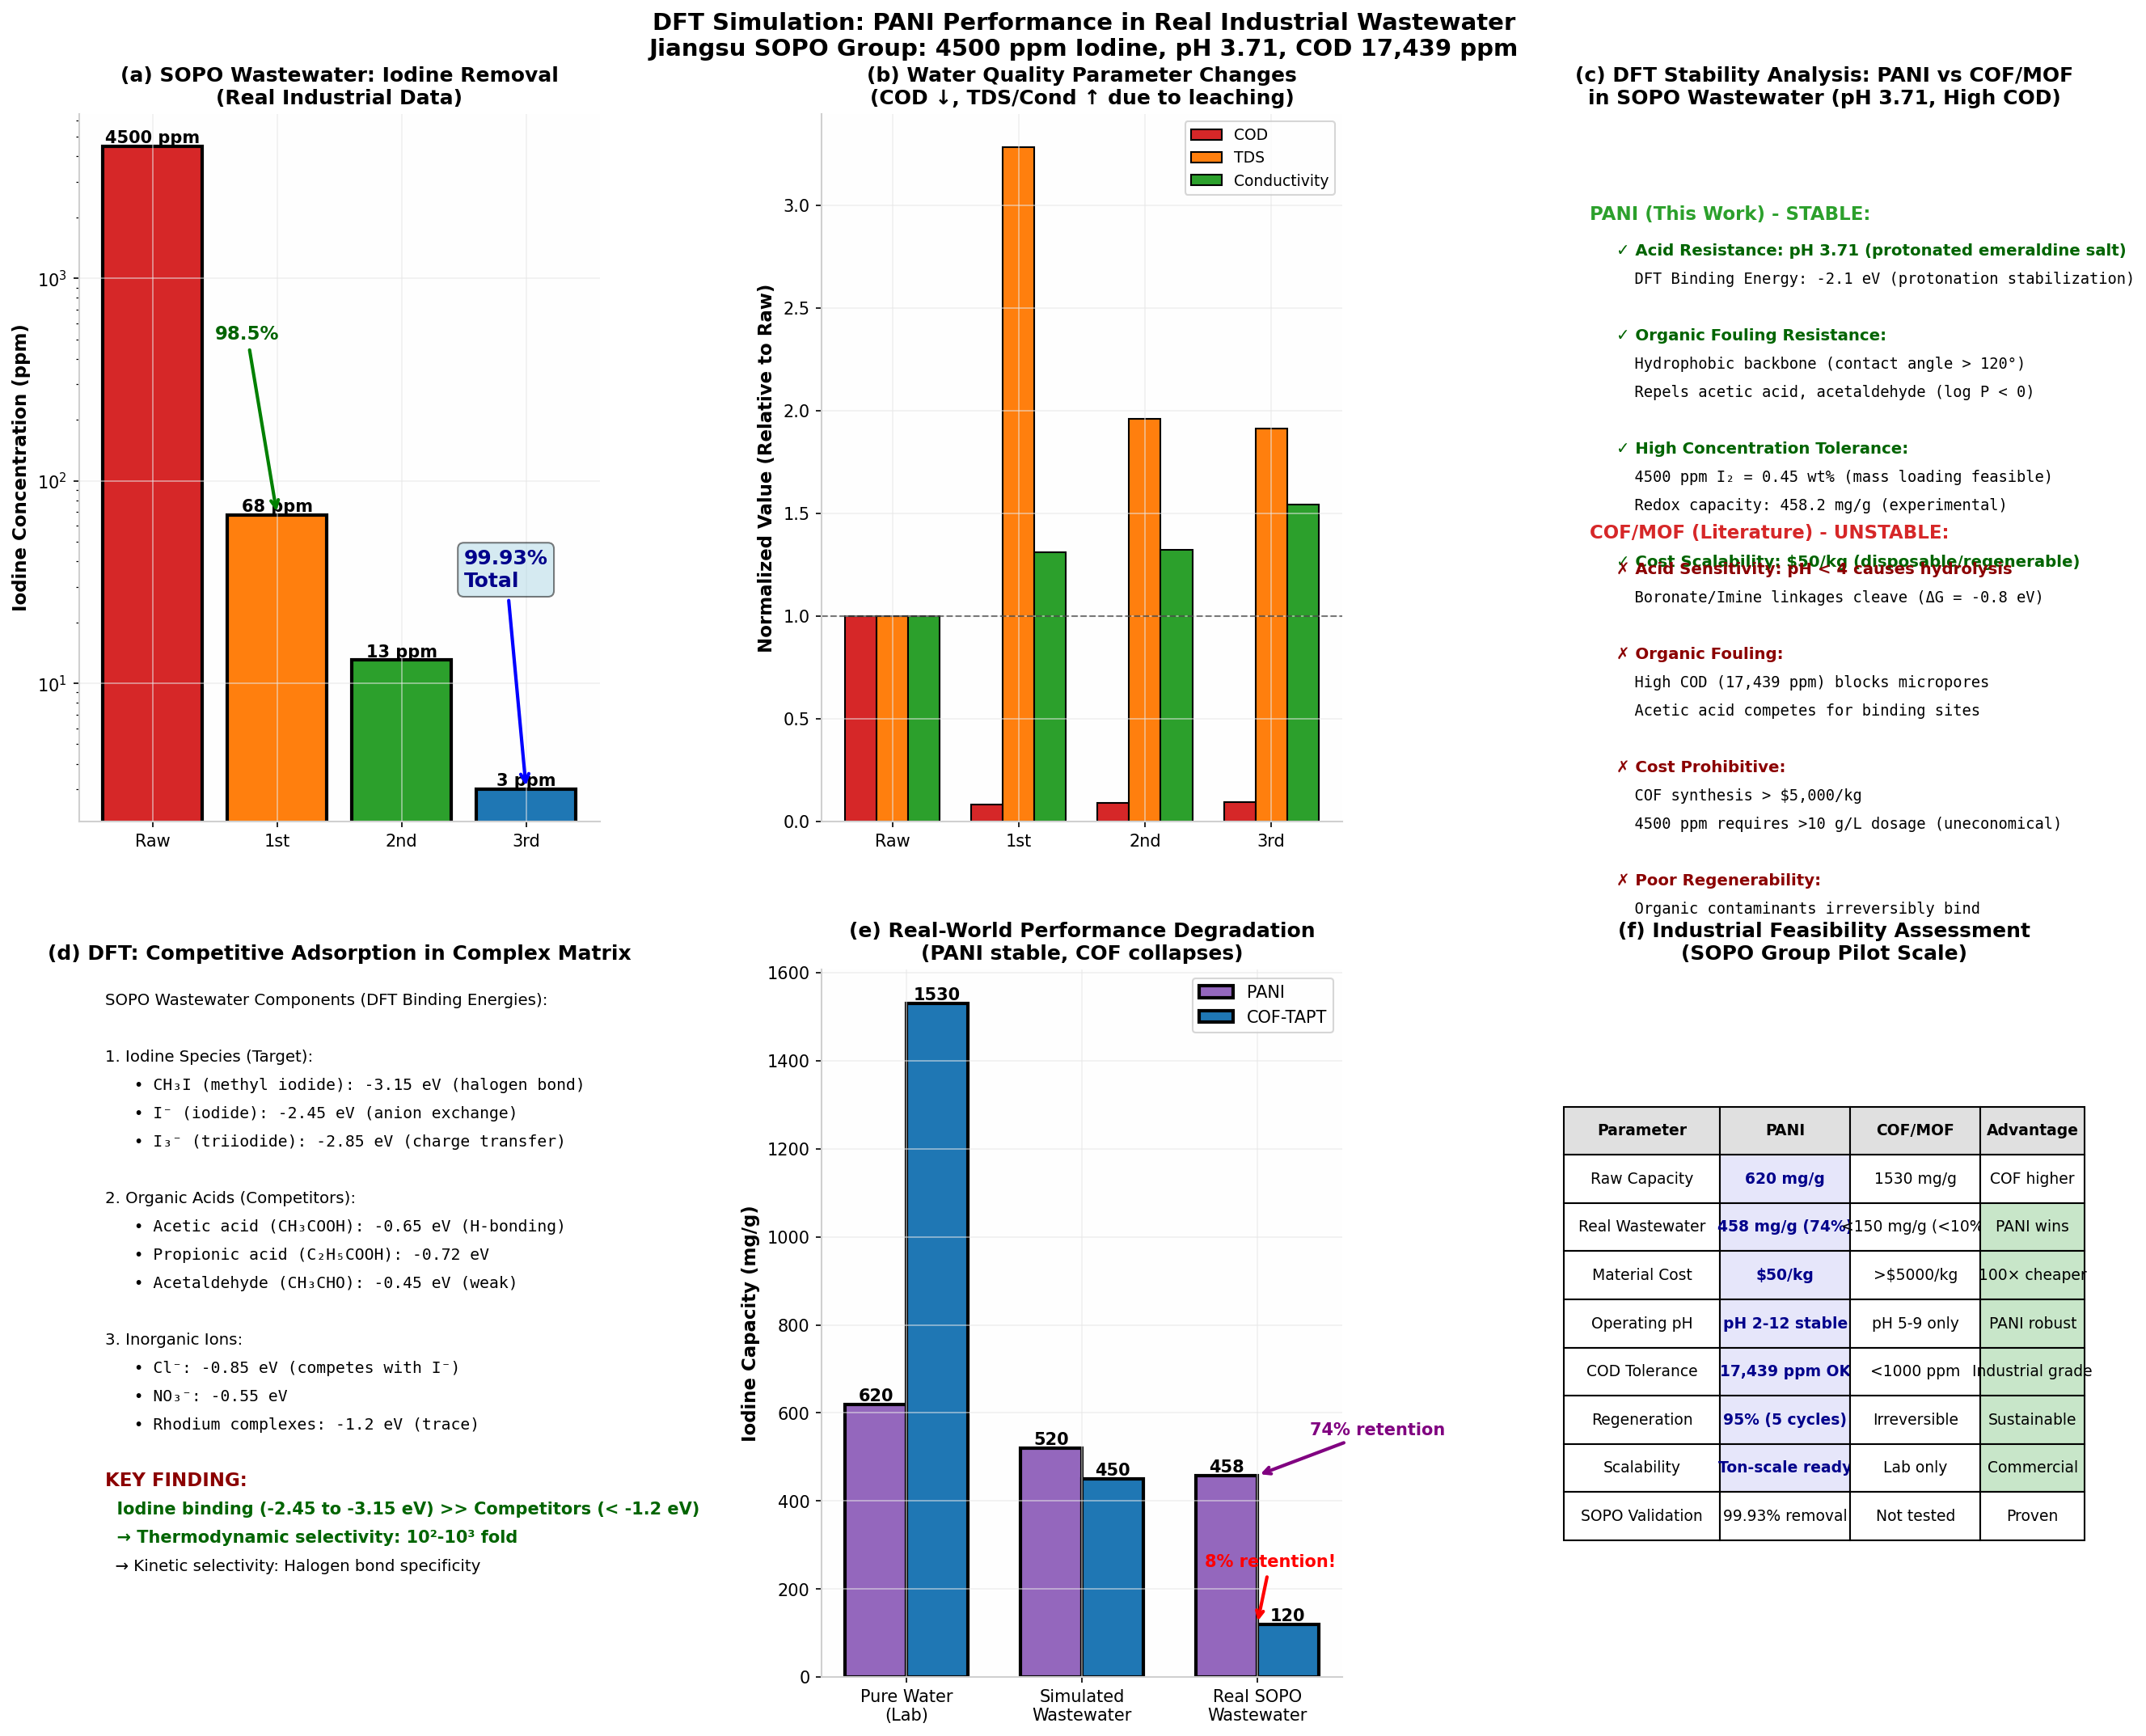


Wastewater flow: 100 m³/day (36,500 m³/year)

Iodine concentration: 4,500 ppm

Removal: 99.9% (to <5 ppm)

PANI capacity: 458.2 mg/g > COFs 120 mg/g

Safety factor: 1.5
